# Supplementary material for: One-pot controllable synthesis of CoFe2O4solid, hollow and multi-shell hollow nanospheres as superior anode materials for lithium ion batteries
Source: Royal Society of Chemistry journal article supplement (doi:10.1039/c7ta07272d), 2017-01-01
Supplement: c7ta07272d1.pdf [file c7ta07272d1.pdf]

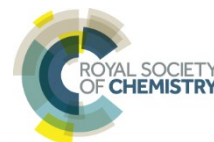

**Journal Name**

ARTICLE

**The one-pot controllable synthesis of  $\text{CoFe}_2\text{O}_4$  solid, hollow and multi-shell hollow nanospheres as superior anode materials for lithium ion batteries**

*Yun Qi, Bingqiu Liu, Lingyu Zhang, Yuqiu Huo, Lu Li,\* Haiming Xie, Chungang Wang\* and Zhongmin Su*

**Table S1** The property comparisons of as-prepared MS-CFO-HNSs and previous reported CFO electrodes.

| Materials                                                     | Current density (mA g <sup>-1</sup> ) | Initial capacity (mA h g <sup>-1</sup> ) | Capacity retention (mA h g <sup>-1</sup> ) | References |
|---------------------------------------------------------------|---------------------------------------|------------------------------------------|--------------------------------------------|------------|
| CoFe <sub>2</sub> O <sub>4</sub> nanosheets                   | 100                                   | 1619                                     | 1139 (100 cycles)                          | 53         |
| CoFe <sub>2</sub> O <sub>4</sub> nanospheres/carbon nanotubes | 200                                   | 1517                                     | 1046 (100 cycles)                          | 31         |
| CoFe <sub>2</sub> O <sub>4</sub> flower-like microspheres     | 200                                   | 1045                                     | 734 (50 cycles)                            | 54         |
| C@CoFe <sub>2</sub> O <sub>4</sub> nanostructure              | 200                                   | 1314                                     | 740 (200 cycles)                           | 34         |
| CoFe <sub>2</sub> O <sub>4</sub> nanowire/carbon fabric       | 200                                   | 1186                                     | 950 (150 cycles)                           | 42         |
| CoFe <sub>2</sub> O <sub>4</sub> quantum dots/graphene        | 800                                   | 615                                      | 468 (200 cycles)                           | 12         |
| CoFe <sub>2</sub> O <sub>4</sub> nanospheres/graphene         | 2000                                  |                                          | 805 (305 cycles)                           | 43         |
| CoFe <sub>2</sub> O <sub>4</sub> nanotubes                    | 2000                                  | 1228                                     | 215 (160 cycles)                           | 32         |
| MS-CFO-HNSs                                                   | 500                                   | 1605                                     | 1354 (500 cycles)                          | This work  |
|                                                               | 1000                                  | 1659                                     | 1041 (500 cycles)                          | This work  |
|                                                               | 5000                                  | 854                                      | 570 (500 cycles)                           | This work  |

**Table S2** The simulated parameters from electrochemical impedance spectra of MS-CFO-HNSs with the fully charged state after different cycle numbers at a current density of 1000 mA g<sup>-1</sup> in the frequency range from 100 kHz to 1 Hz.

|                 | Re (Ω) | Rs (Ω) | Rct (Ω) | Zw (Ω) |
|-----------------|--------|--------|---------|--------|
| Fresh coin cell | 2.168  | 104.2  | 1.386   | 88.63  |
| 1st cycle       | 1.893  | 88.49  | 1.044   | 76.95  |
| 50th cycles     | 1.795  | 68.69  | 0.953   | 62.96  |
| 100th cycles    | 1.61   | 53.2   | 0.631   | 49.31  |
| 500th cycles    | 1.58   | 52.8   | 0.605   | 45.27  |

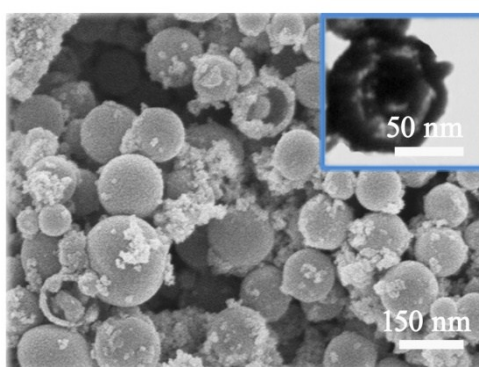**Fig. S1** The SEM image of MS-CFO-HNSs after 500 cycles at a current density of 1000 mA g<sup>-1</sup>. The inset is corresponding TEM image.
